# Supplementary material for: Derivation and Expansion of PAX7-Positive Muscle Progenitors from Human and Mouse Embryonic Stem Cells
Source: PubMed Central journal article supplement — Stem Cell Reports. 2014 Aug 7;3(3):516–29. doi: 10.1016/j.stemcr.2014.07.001 (PMC4266001; doi:10.1016/j.stemcr.2014.07.001), 2014-08-07
Supplement: mmc1.pdf [file mmc1.pdf]

**Stem Cell Reports, Volume 3**

**Supplemental Information**

**Derivation and Expansion of PAX7-Positive Muscle  
Progenitors from Human and Mouse Embryonic Stem Cells**

**Michael Shelton, Jeff Metz, Jun Liu, Richard L. Carpenedo, Simon-Pierre Demers,  
William L. Stanford, and Ilona S. Skerjanc**

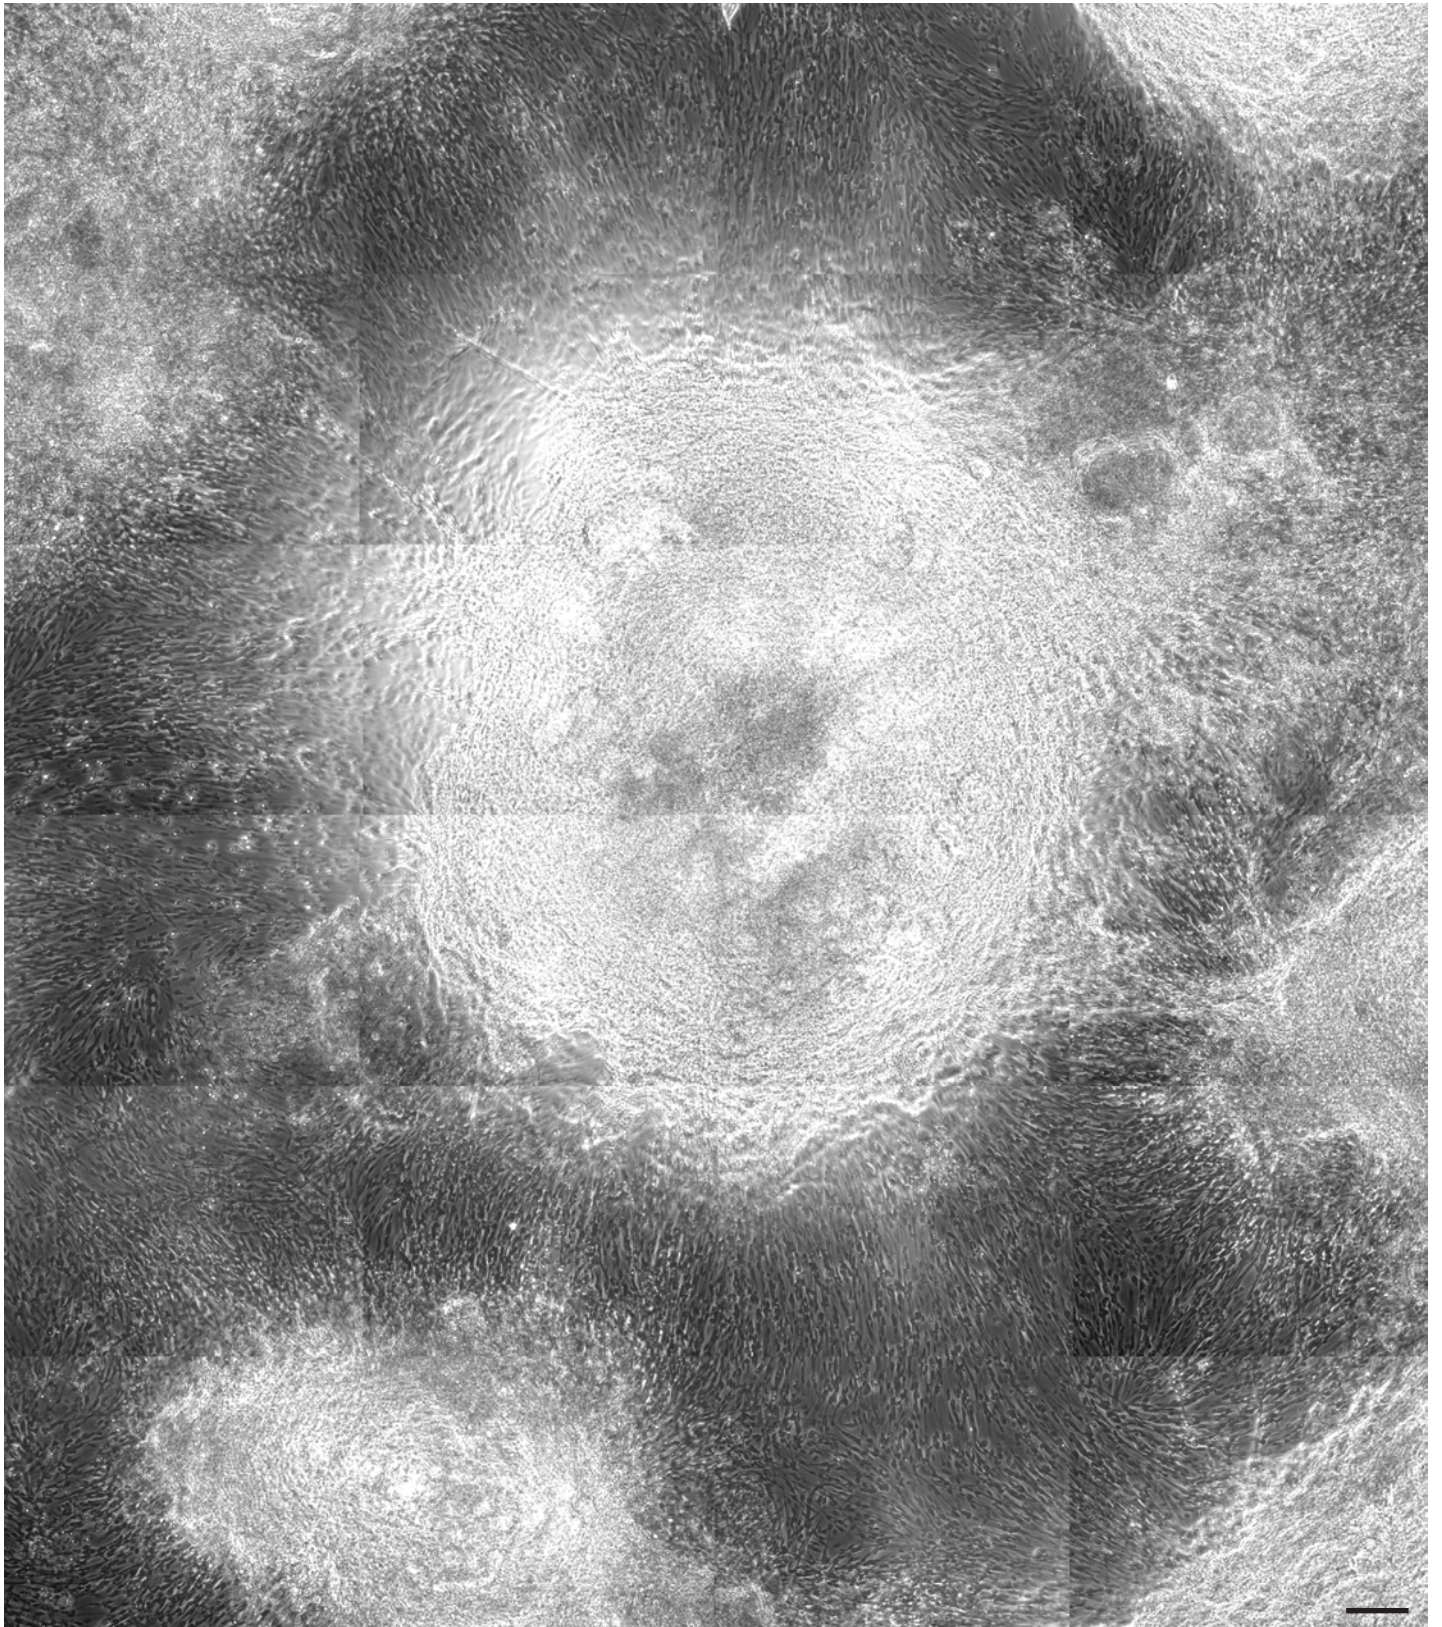



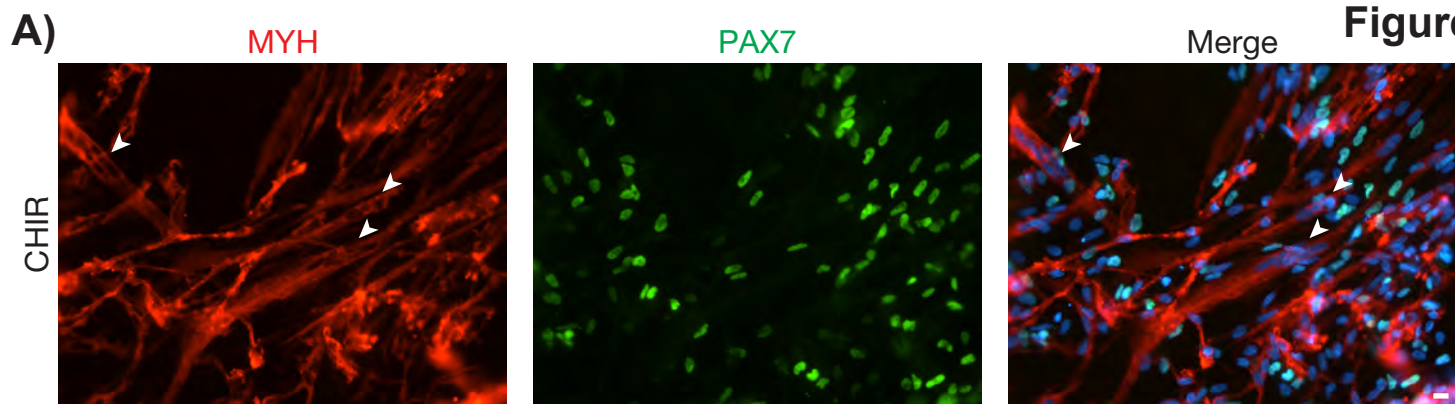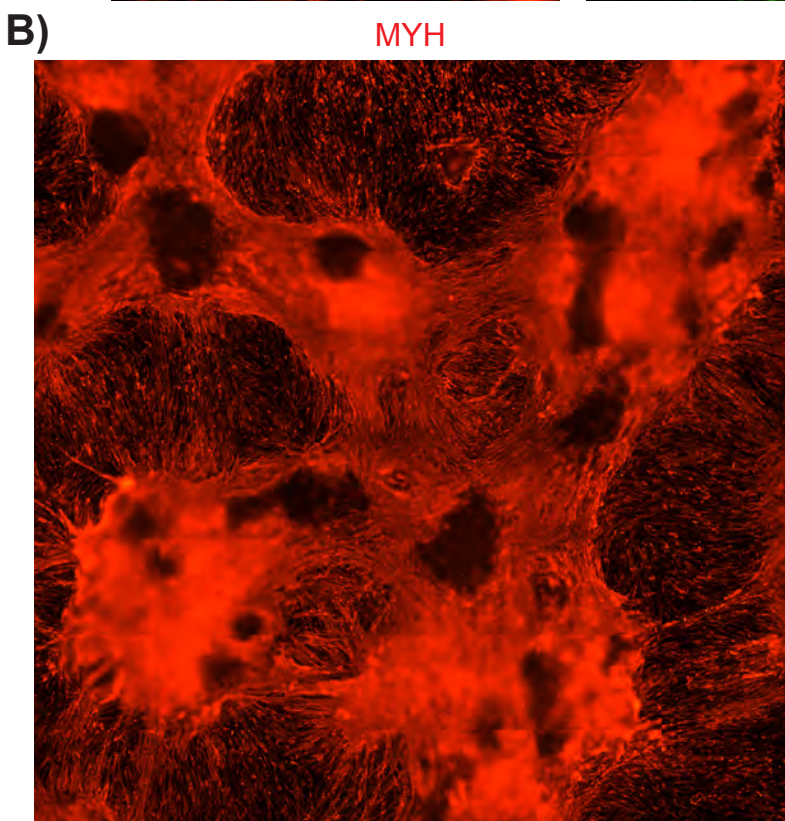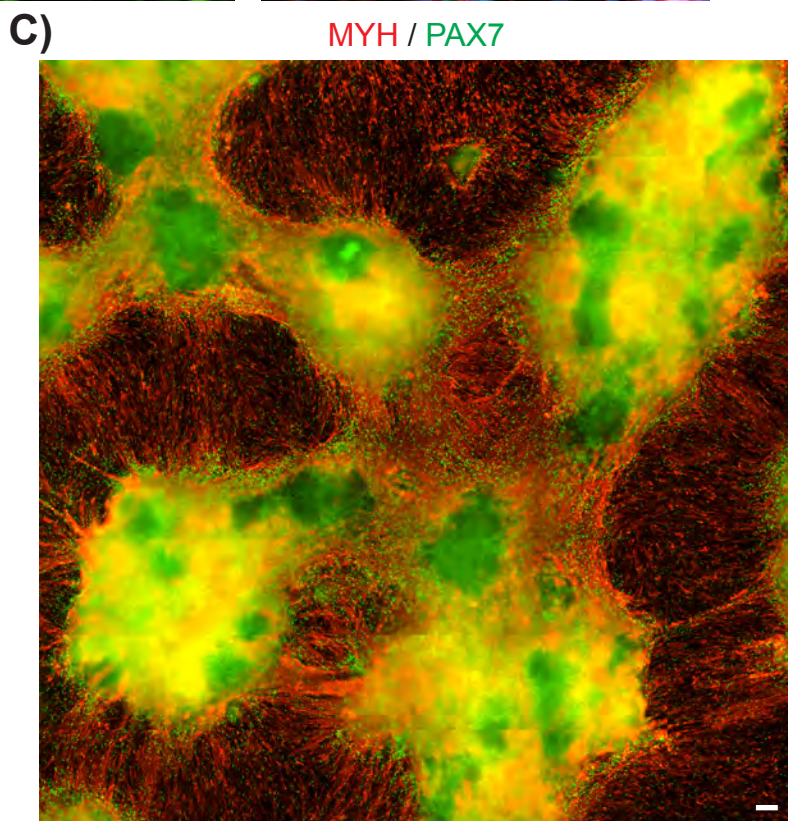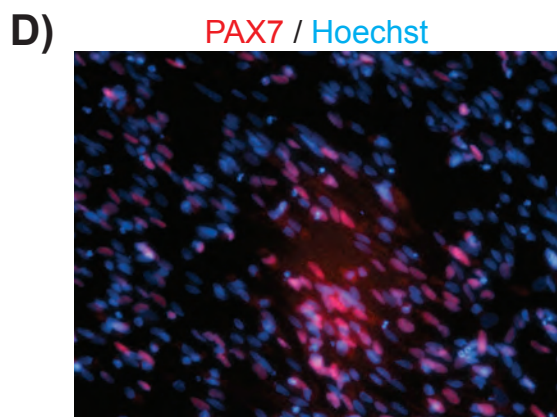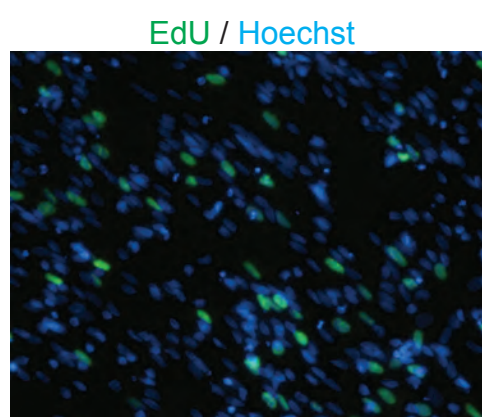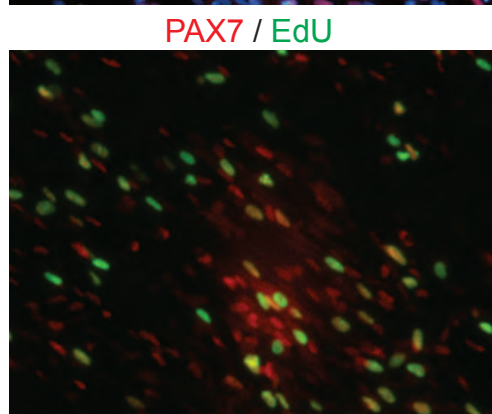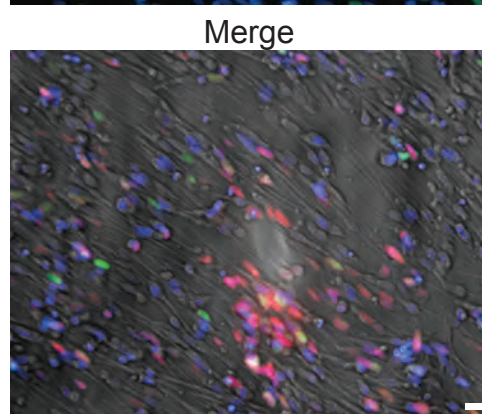

**Figure S3**

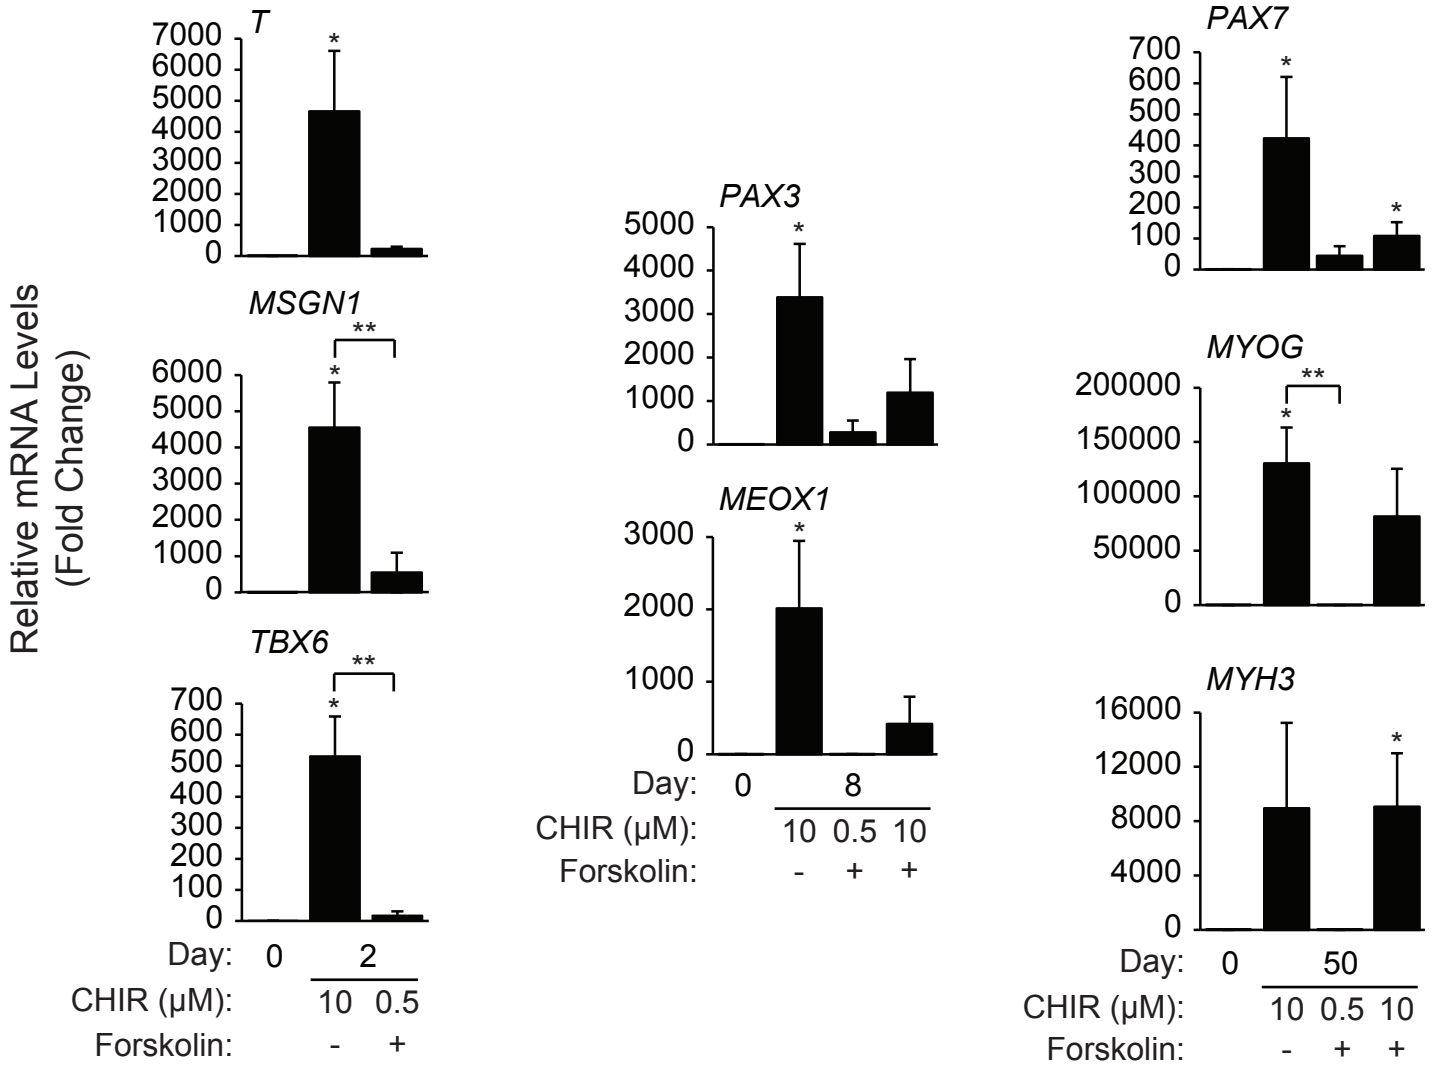



**Figure S1. Mature CHIR-differentiated skeletal myocytes display orderly alignment, related to Figure 1.** Multiple phase contrast images were captured at day 50 and tiled together using Volocity Software; depicted is an embryoid-body-like cluster of cells (center) and skeletal myocytes aligned radially around its periphery (scale bar = 200  $\mu\text{m}$ ).

**Figure S2. Fusion competence and high resolution imaging of CHIR-treated cultures, related to Figure 2.** **A)** Immunofluorescence staining with antibodies against myosin heavy chain (MYH) confirms the presence of multinucleated myotubes (white arrowheads) at day 40 (scale bar = 20  $\mu\text{m}$ ). **B & C)** Multiple images were captured at day 50 and tiled together using Volocity Software, representing 27.06  $\text{mm}^2$  of culture area. Separate panels are provide for **B)** MYH, and **C)** PAX7 and MYH merged (scale bar = 200  $\mu\text{m}$ ). **D)** Day 50 CHIR-treated cells were pulsed with EdU for 4 hours and stained for EdU, PAX7 and with Hoechst dye (scale bar = 20  $\mu\text{m}$ ).

**Figure S3. Forskolin did not enhance the CHIR-driven development of mesoderm or terminal myogenesis, related to Figure 3.** The 0.5  $\mu\text{M}$  CHIR, 10 ng/mL FGF2, and 20  $\mu\text{M}$  Forskolin cocktail as performed by Xu et al. was applied for the first 7 days of our differentiation, or FGF2 and Forskolin were applied between days 2 and 7 following our 10  $\mu\text{M}$  CHIR treatment. Including FGF2 and Forskolin during 10  $\mu\text{M}$  CHIR treatment from days 0 to 2 had excessive toxicity towards the cells and was not pursued (data not shown). qPCR for early mesoderm, somite, or terminal myogenic genes showed no significant improvement with the addition of Forskolin in our protocol ( $n = 3$  independent experiments,  $*p \leq 0.05$  vs. day 0,  $**p \leq 0.05$  Forskolin vs. 10  $\mu\text{M}$  CHIR).

**Movie S1. Functional contractions of mature CHIR-differentiated skeletal myocytes, related to Figure 2.**

**Table S1. Media and components utilized in the growth and differentiation of hESCs, related to Experimental Procedures.**

| E8/E6 Media        |             |
|--------------------|-------------|
| DMEM/F12           | 100%        |
| Components:        |             |
| NaHCO <sub>3</sub> | 543 µg/mL   |
| Ascorbic Acid      | 64 µg/mL    |
| Insulin            | 19.4 µg/mL  |
| Transferrin        | 10.7 µg/mL  |
| Sodium Selenium    | 0.014 µg/mL |
| Gentamicin         | 50 µg/mL    |
| FGF2 (E8 Only)     | 100 ng/mL   |
| TGFβ1 (E8 Only)    | 2 ng/mL     |

| StemPro-34 Media |            |
|------------------|------------|
| StemPro-34 SFM   | 100%       |
| Components:      |            |
| L-Glutamine      | 2 mM       |
| Monothioglycerol | 0.45 mM    |
| Transferrin      | 10.7 µg/mL |
| Gentamicin       | 5 µg/mL    |
| FGF2             | 5 ng/mL    |

| N2 Media                         |         |
|----------------------------------|---------|
| DMEM/F12                         | 100%    |
| Components:                      |         |
| Insulin / Transferrin / Selenium | 1%      |
| N2 Supplement                    | 1%      |
| Gentamicin                       | 5 µg/mL |



**Table S2. Media and components utilized in the growth and differentiation of mESCs, related to Experimental Procedures.**

| Maintenance Media          |           |
|----------------------------|-----------|
| DMEM                       | 85%       |
| Fetal Bovine Serum         | 15%       |
| Components:                |           |
| Non-Essential Amino Acids  | 1%        |
| Penicillin / Streptomycin  | 1%        |
| $\beta$ -Mercaptoethanol   | 0.1 mM    |
| Leukemia Inhibitory Factor | 1000 U/mL |

  

| Serum Free Maintenance Media |           |
|------------------------------|-----------|
| Neurobasal                   | 50%       |
| DMEM/F12                     | 50%       |
| Components:                  |           |
| B27 Supplement               | 1%        |
| Penicillin / Streptomycin    | 1%        |
| Bovine Serum Albumin         | 0.5%      |
| N2 Supplement                | 0.5%      |
| L-Glutamine                  | 2 mM      |
| Monothioglycerol             | 0.15 mM   |
| Leukemia Inhibitory Factor   | 1000 U/mL |
| BMP4                         | 10 ng/mL  |

  

| Serum Free Differentiation Media |               |
|----------------------------------|---------------|
| IMDM                             | 75%           |
| F12                              | 25%           |
| Components:                      |               |
| B27 (w/o RA) Supplement          | 1%            |
| Penicillin / Streptomycin        | 1%            |
| Bovine Serum Albumin             | 0.5%          |
| N2 Supplement                    | 0.5%          |
| Monothioglycerol                 | 0.45 mM       |
| Ascorbic Acid                    | 50 $\mu$ g/mL |

  

| StemPro-34 Media          |          |
|---------------------------|----------|
| StemPro-34 SFM            | 100%     |
| Components:               |          |
| Penicillin / Streptomycin | 1%       |
| L-Glutamine               | 2 mM     |
| FGF2                      | 10 ng/mL |

  

| N2 Media                  |      |
|---------------------------|------|
| DMEM/F12                  | 100% |
| Components:               |      |
| N2 Supplement             | 1%   |
| Penicillin / Streptomycin | 1%   |

**Table S3. List of qPCR primers, related to Experimental Procedures.**

| Human Primer Name | Forward Primer (5' - 3') | Reverse Primer (5' - 3') |
|-------------------|--------------------------|--------------------------|
| <i>T</i>          | TTCATAGCGGTGACTGCTTATCA  | CACCCCCATTGGGAGTACC      |
| <i>EN1</i>        | GAGCGCAGGGCACCAAATA      | CGAGTCAGTTTTGACCACGG     |
| <i>FOXA2</i>      | TGTGTATTCTGGCTGCAAGG     | CCTGCAACCAGACAGGGTAT     |
| <i>GAPDH</i>      | TGGTGCTGAGTATGTCGTGGAGT  | AGTCTTCTGAGTGGCAGTGATGG  |
| <i>LBX1</i>       | CTCGCCAGCAAGACGTTTAAG    | CGCTGCCCAAAGATGGTCATA    |
| <i>MEOX1</i>      | GCAGGGGGTTCCAAGGAAAT     | GTCAGGTAGTTATGATGGGCAAA  |
| <i>MET</i>        | AGCGTCAACAGAGGGACCT      | GCAGTGAACCTCCGACTGTATG   |
| <i>MSGN1</i>      | AACCTGCGCGAGACTTTCC      | ACAGCTGGACAGGGAGAAGA     |
| <i>MYF5</i>       | AATTTGGGGACGAGTTTGTG     | CATGGTGGTGGACTTCCTCT     |
| <i>MYH3</i>       | TTGATGCCAAGACGTATTGCT    | GGGGGTTTCATGGCGTACAC     |
| <i>MYH6</i>       | CAACAATCCCTACGACTACGC    | ACGTCAAAGGCACTATCGGTG    |
| <i>MYL2</i>       | TTGGGCGAGTGAACGTGAAAA    | CCGAACGTAATCAGCCTTCAG    |
| <i>MYOD1</i>      | TGCACGTGAGCAATCCAAA      | CCGCTGTAGTCCATCATGCC     |
| <i>MYOG</i>       | GCTGTATGAGACATCCCCCTA    | CGACTTCCTCTTACACACCTTAC  |
| <i>NEUROG1</i>    | GCTCTCTGACCCAGTAGC       | GCGTTGTGTGGAGCAAGTC      |
| <i>NKX2-5</i>     | GCAGGACCAGACTCTGGAGC     | GAGTCCCCTAGGCATGGCTT     |
| <i>NOG</i>        | GGCCAGCACTATCTCCACAT     | ATGAAGCCTGGGTCTAGTGT     |
| <i>NPPA</i>       | TCCTCTGATCGATCTGCCCT     | CTCTGGGCTCCAATCCTGTC     |
| <i>PAX3</i>       | CTCACCTCAGGTAATGGGACT    | CGTGGTGGTAGGTTCCAGAC     |
| <i>PAX7</i>       | CCCCCGCACGGGATT          | TATCTTGTGGCGGATGTGGTTA   |
| <i>SIM1</i>       | TCCATAATCAGACTCACGACCA   | TGGGGCTACCACGAAGATGAA    |
| <i>SOX2</i>       | TACAGCATGTCCTACTCGCAG    | GAGGAAGAGGTAACCACAGGG    |
| <i>SOX10</i>      | CCTCACAGATCGCCTACACC     | CATATAGGAGAAGGCCGAGTAGA  |
| <i>TBX6</i>       | CATCCACGAGAATTGTACCCG    | AGCAATCCAGTTTAGGGGTGT    |

  

| Mouse Primer Name | Forward Primer (5' - 3') | Reverse Primer (5' - 3') |
|-------------------|--------------------------|--------------------------|
| <i>Actb</i>       | AAATCGTGCGTGACATCAAA     | AAGGAAGGCTGGAAAAGAGC     |
| <i>T</i>          | CTGGACTTCGTGACGGCTG      | TGACTTTGCTGAAAGACACAGG   |
| <i>Meox1</i>      | TGGCCTATGCAGAATCCATTCC   | TGGATCTGAGCTGCGCATGTG    |
| <i>Msgn1</i>      | CTTCTGACACCGCTGGTCTG     | GTGACTGCCGTAGCCATCG      |
| <i>Myh3</i>       | GCATAGCTGCACCTTTCCTC     | GGCCATGTCCTCAATCTTGT     |
| <i>Myh6</i>       | CAACAACCCATACGACTACGC    | ACATCAAAGGGCCACTATCAGTG  |
| <i>Myod1</i>      | CCCCGGCGGCAGAATGGCTACG   | GGTCTGGGTTCCCTGTTCTGTGT  |
| <i>Myog</i>       | GCAATGCACTGGAGTTCG       | ACGATGGACGTAAGGGAGTG     |
| <i>Nkx2-5</i>     | AAGCAACAGCGGTACCTGTC     | GCTGTCGCTTGCACTTGTAG     |
| <i>Pax3</i>       | TTTCACCTCAGGTAATGGGACT   | GAACGTCCAAGGCTTACTTTGT   |
| <i>Pax7</i>       | CTCAGTGAGTTCGATTAGCCG    | AGACGGTTCCTTTGTGCG       |
